# Supplementary material for: Ecological response to collapse of the biological pump following the mass extinction at the Cretaceous–Paleogene boundary
Source: Copernicus journal article supplement (doi:10.5194/bg-14-885-2017), 2017-02-27
Supplement: Supplementary file 2 [file bg-14-885-2017-supplement.zip]

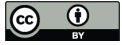

*Supplement of*

**Ecological response to collapse of the biological pump following the mass extinction at the Cretaceous–Paleogene boundary**

**Johan Vellekoop et al.**

*Correspondence to:* Johan Vellekoop ([johan.vellekoop@kuleuven.be](mailto:johan.vellekoop@kuleuven.be))

- [bg-14-885-2017-supplement-title-page.pdf](#)
- [Vellekoop et al Data Set S1.xlsx](#)
- [Vellekoop et al Data Set S2.xlsx](#)
- [Vellekoop et al Supplemental Information.pdf](#)

The copyright of individual parts of the supplement might differ from the CC-BY 3.0 licence.
